# Supplementary material for: Green synthesis of novel polyoxoanions of tungsten containing phosphorus as a heteroatom: characterization, non-isothermal decomposition kinetics and photocatalytic activity
Source: Royal Society of Chemistry journal article supplement (doi:10.1039/c4nj01098a), 2014-09-01
Supplement: c4nj01098a1.pdf [file c4nj01098a1.pdf]

## **Supporting Information File**

# **Green Synthesis of Novel Polyoxoanions of Tungsten Containing Phosphorus as Hetero atom: Characterization, Non-isothermal Decomposition Kinetics and Photocatalytic Activity**

**Bessy D'Cruz, Jadu Samuel\*, Mulloor Kesavapillai Sreedhar and Leena George**

**New Journal of Chemistry**

**Department of Chemistry  
Mar Ivanios College**

**Nalanchira, Thiruvananthapuram -695015, Kerala,**

**India**

**Fax: +91 471 2530023**

**E-mail: [jadu\\_samuel@yahoo.co.in](mailto:jadu_samuel@yahoo.co.in)**

## 1. The Figures discussed in the manuscript

**Fig. S1** (a-b) SEM (c) TEM (d-e) AFM images of CPW nanospheres.

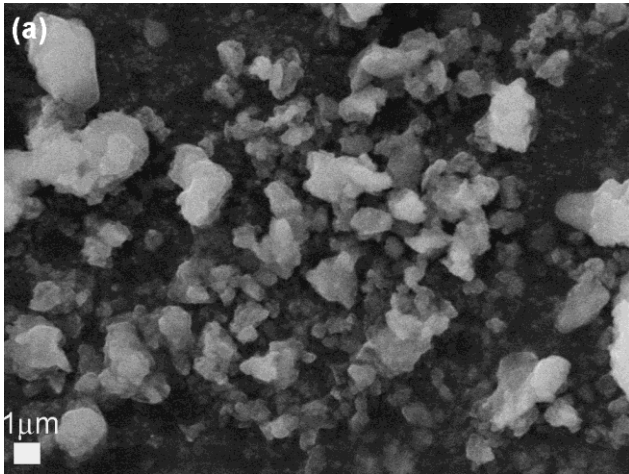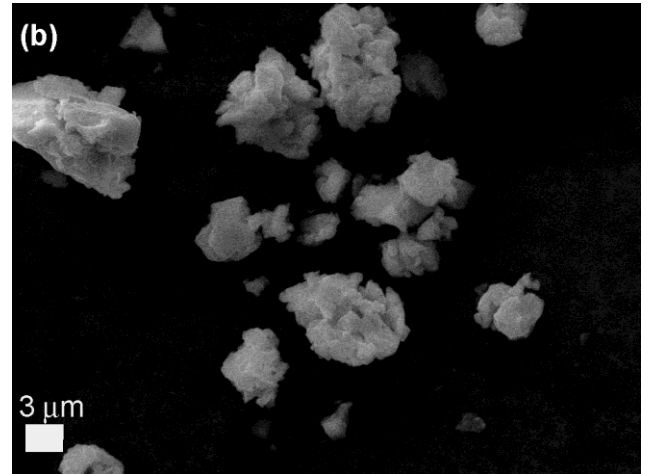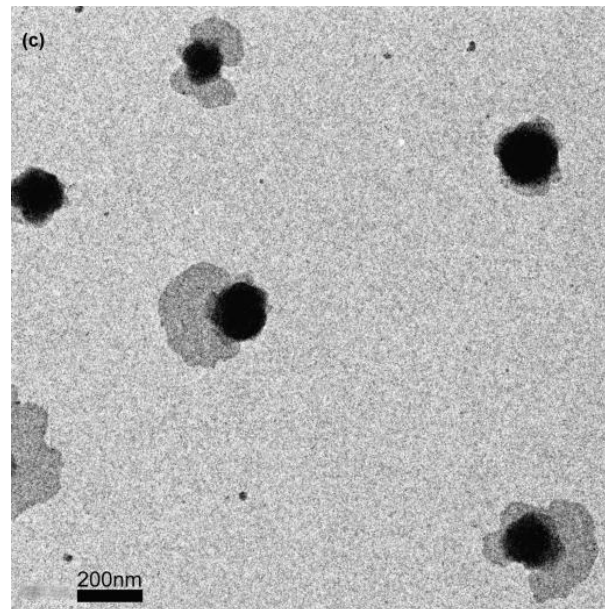

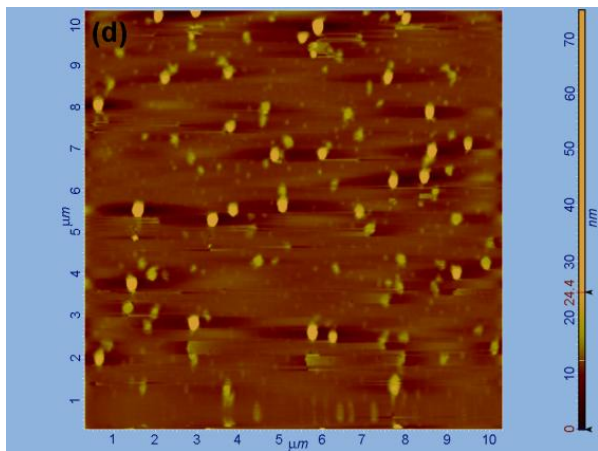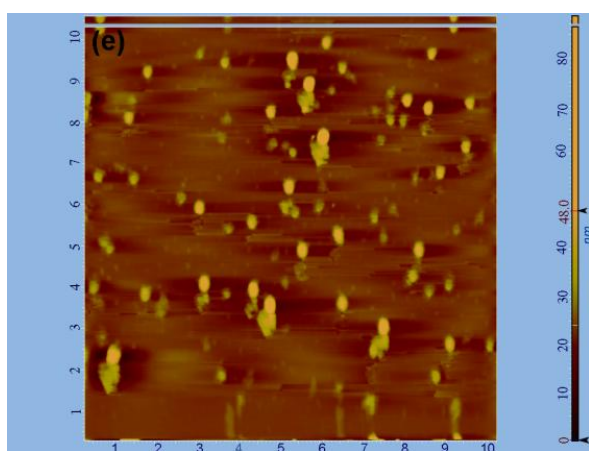

## 2. The Tables discussed in the manuscript

**Table S1** Kinetic parameters for stages I and II for the non–isothermal decomposition of CPW by FWO and KAS methods.

| Degree of Conversion ( $\alpha$ ) | FWO               |                   | KAS               |                   |
|-----------------------------------|-------------------|-------------------|-------------------|-------------------|
|                                   | Stage I           | Stage II          | Stage I           | Stage II          |
|                                   | $E$ (kJ/mol)      | $E$ (kJ/mol)      | $E$ (kJ/mol)      | $E$ (kJ/mol)      |
| 0.1                               | 190.14 $\pm$ 9.51 | 172.17 $\pm$ 8.61 | 190.48 $\pm$ 9.52 | 169.96 $\pm$ 8.50 |
| 0.2                               | 173.43 $\pm$ 8.67 | 175.21 $\pm$ 8.76 | 172.77 $\pm$ 8.64 | 173.09 $\pm$ 8.65 |
| 0.3                               | 164.56 $\pm$ 8.23 | 171.40 $\pm$ 8.57 | 163.32 $\pm$ 8.17 | 169.03 $\pm$ 8.45 |
| 0.4                               | 160.02 $\pm$ 8.0  | 171.56 $\pm$ 8.58 | 158.46 $\pm$ 7.92 | 169.15 $\pm$ 8.46 |
| 0.5                               | 155.46 $\pm$ 7.77 | 172.03 $\pm$ 8.60 | 153.57 $\pm$ 7.68 | 169.62 $\pm$ 8.48 |
| 0.6                               | 153.98 $\pm$ 7.70 | 171.27 $\pm$ 8.56 | 151.91 $\pm$ 7.60 | 168.78 $\pm$ 8.44 |
| 0.7                               | 145.43 $\pm$ 7.27 | 170.10 $\pm$ 8.50 | 142.82 $\pm$ 7.14 | 167.51 $\pm$ 8.38 |
| 0.8                               | 144.34 $\pm$ 7.23 | 170.55 $\pm$ 8.53 | 141.56 $\pm$ 7.08 | 167.94 $\pm$ 8.40 |
| 0.9                               | 139.64 $\pm$ 6.98 | 172.70 $\pm$ 8.63 | 136.50 $\pm$ 6.82 | 170.17 $\pm$ 8.51 |
| Average                           | 158.56 $\pm$ 7.93 | 171.89 $\pm$ 8.59 | 156.82 $\pm$ 7.84 | 169.47 $\pm$ 8.47 |

**Table S2** Expressions for  $g(\alpha)$  reaction model to describe the reaction kinetics in heterogeneous solid state systems.

| Mechanism                     | Symbols   | Formula of $g(\alpha)$             |
|-------------------------------|-----------|------------------------------------|
| Mampel power law (n=2)        | $P_2$     | $2\alpha^{1/2}$                    |
| Mampel power law (n=3)        | $P_3$     | $1.5\alpha^{2/3}$                  |
| Mampel power law (n=4)        | $P_4$     | $4\alpha^{3/4}$                    |
| Avrami-Erofeev eq.            | $A_2$     | $[-\ln(1-\alpha)]^{1/2}$           |
| Avrami-Erofeev eq.            | $A_3$     | $[-\ln(1-\alpha)]^{1/3}$           |
| Avrami-Erofeev eq.            | $A_4$     | $[-\ln(1-\alpha)]^{1/4}$           |
| Avrami-Erofeev eq.            | $A_{3/2}$ | $[-\ln(1-\alpha)]^{2/3}$           |
| Power law                     | $R_1$     | $\alpha$                           |
| Power law                     | $R_2$     | $1-(1-\alpha)^{1/2}$               |
| Power law                     | $R_3$     | $1-(1-\alpha)^{1/3}$               |
| Parabolic law                 | $D_1$     | $\alpha^2$                         |
| Valensi eq.                   | $D_2$     | $\alpha+(1-\alpha)[\ln(1-\alpha)]$ |
| Jander eq.                    | $D_3$     | $[1-(1-\alpha)^{1/3}]^2$           |
| Anti-Ginstling-Brounstein eq. | $D_4$     | $1-(2\alpha/3)-(1-\alpha)^{2/3}$   |
| Anti-Zhuravlev eq.            | $D_5$     | $[(1+\alpha)^{1/3}-1]^2$           |
| First order (Mampel)          | $F_1$     | $-\ln(1-\alpha)$                   |
| Second order                  | $F_2$     | $(1-\alpha)^{-1}-1$                |
| Third order                   | $F_3$     | $(1-\alpha)^{-2}-1$                |
| Three-quarters order          | $F_{3/4}$ | $1-(1-\alpha)^{1/4}$               |
| One and a half order          | $F_{3/2}$ | $(1-\alpha)^{-1/2}-1$              |
